# Supplementary material for: Increased Callosal Connectivity in Reeler Mice Revealed by Brain-Wide Input Mapping of VIP Neurons in Barrel Cortex
Source: PubMed Central journal article supplement — Cereb Cortex. 2020 Nov 2;31(3):1427–43. doi: 10.1093/cercor/bhaa280 (PMC7869096; doi:10.1093/cercor/bhaa280), 2020-11-02
Supplement: supplementary_figure_1_bhaa280.pdf [file supplementary_figure_1_bhaa280.pdf]

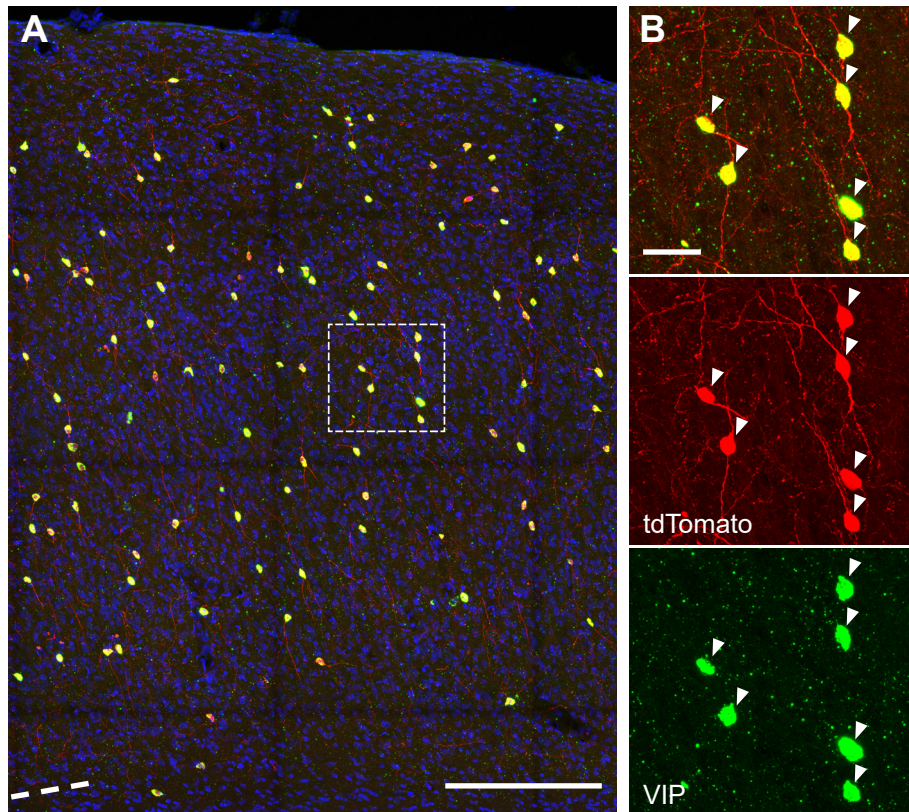

**Figure S1: VIP neurons in the reeler mouse retain VIP expression. Related to Figure 1.**

(A) Section of barrel cortex of a VIP-Cre/reeler/tdTomato mouse stained against VIP-RNA (green) with fluorescent in-situ hybridization. Virtually all tdTomato cells overlapped with VIP signal (scale bar: 200  $\mu\text{m}$ ).

(B) Insert from A, with individual channels to reveal co-localization of tdTomato and VIP signal (scale bar: 20  $\mu\text{m}$ ).
