# Supplementary material for: Increased Callosal Connectivity in Reeler Mice Revealed by Brain-Wide Input Mapping of VIP Neurons in Barrel Cortex
Source: PubMed Central journal article supplement — Cereb Cortex. 2020 Nov 2;31(3):1427–43. doi: 10.1093/cercor/bhaa280 (PMC7869096; doi:10.1093/cercor/bhaa280), 2020-11-02
Supplement: supplementary_figure_3_bhaa280.pdf [file supplementary_figure_3_bhaa280.pdf]

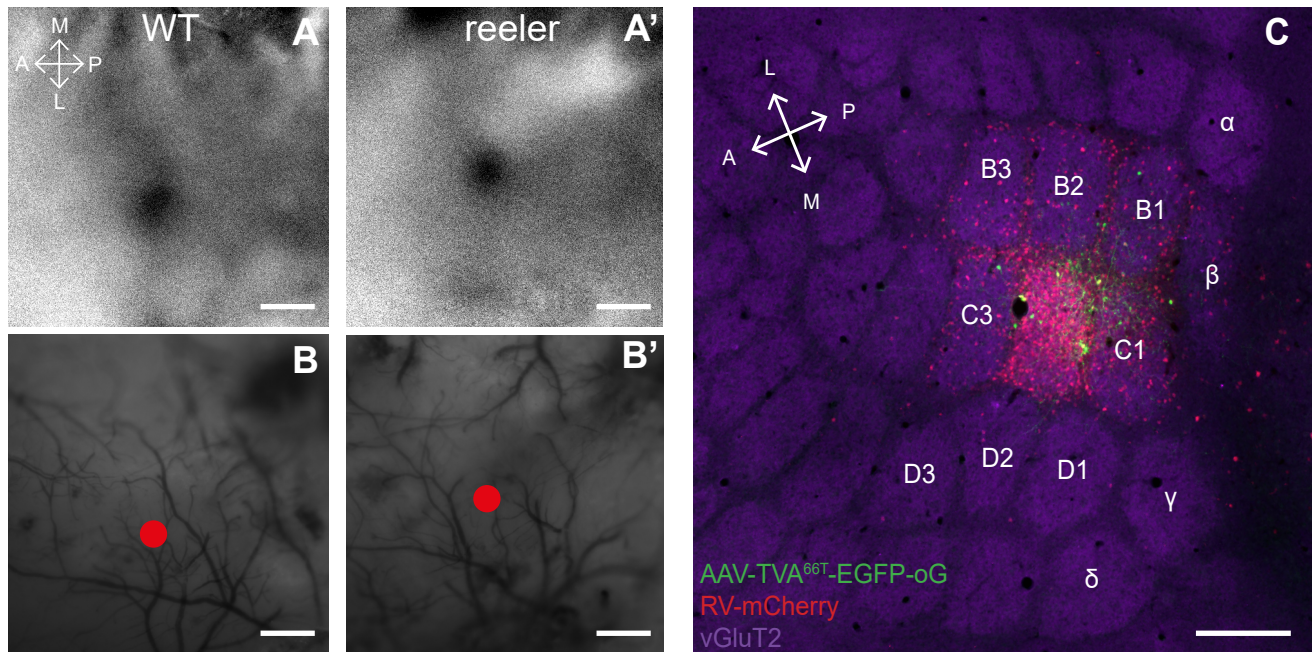

**Figure S3: Mapping the whisker C2-related cortical module in barrel cortex to coherently target the tracer injections. Related to Figure 2.**

(A, A') Red light was shone on the exposed cortical surface and its reflectance was measured with a CCD-camera, while the contralateral C2 whisker was stimulated. Repetitive whisker stimulation over 30 trials led to a localized change in blood flow, which induced a change in light reflectance visible as a dark spot. WT and reeler mice had very similar signals in terms of dynamics and size (scale bar: 200  $\mu$ m).

(B, B') Surface vasculature was overlaid with image in A and the location of the strongest change in reflectance was marked. The blood vessels were used as landmarks to guide the injection pipette to the dot (scale bar: 200  $\mu$ m).

(C) Tangential section of through the barrel cortex of a WT mouse after targeted injection of AAV-TVA66T-EGFP-oG and RV-mCherry into the C2 column. Staining thalamic terminals with vesicular glutamate transporter 2 (vGluT2) allowed to visualize the barrels. The density of input cells was highest in C2 indicating that the majority of VIP starter cells was located within this barrel-related column (scale bar: 200  $\mu$ m).
