# Supplementary material for: Increased Callosal Connectivity in Reeler Mice Revealed by Brain-Wide Input Mapping of VIP Neurons in Barrel Cortex
Source: PubMed Central journal article supplement — Cereb Cortex. 2020 Nov 2;31(3):1427–43. doi: 10.1093/cercor/bhaa280 (PMC7869096; doi:10.1093/cercor/bhaa280), 2020-11-02
Supplement: supplementary_figure_4_bhaa280.pdf [file supplementary_figure_4_bhaa280.pdf]

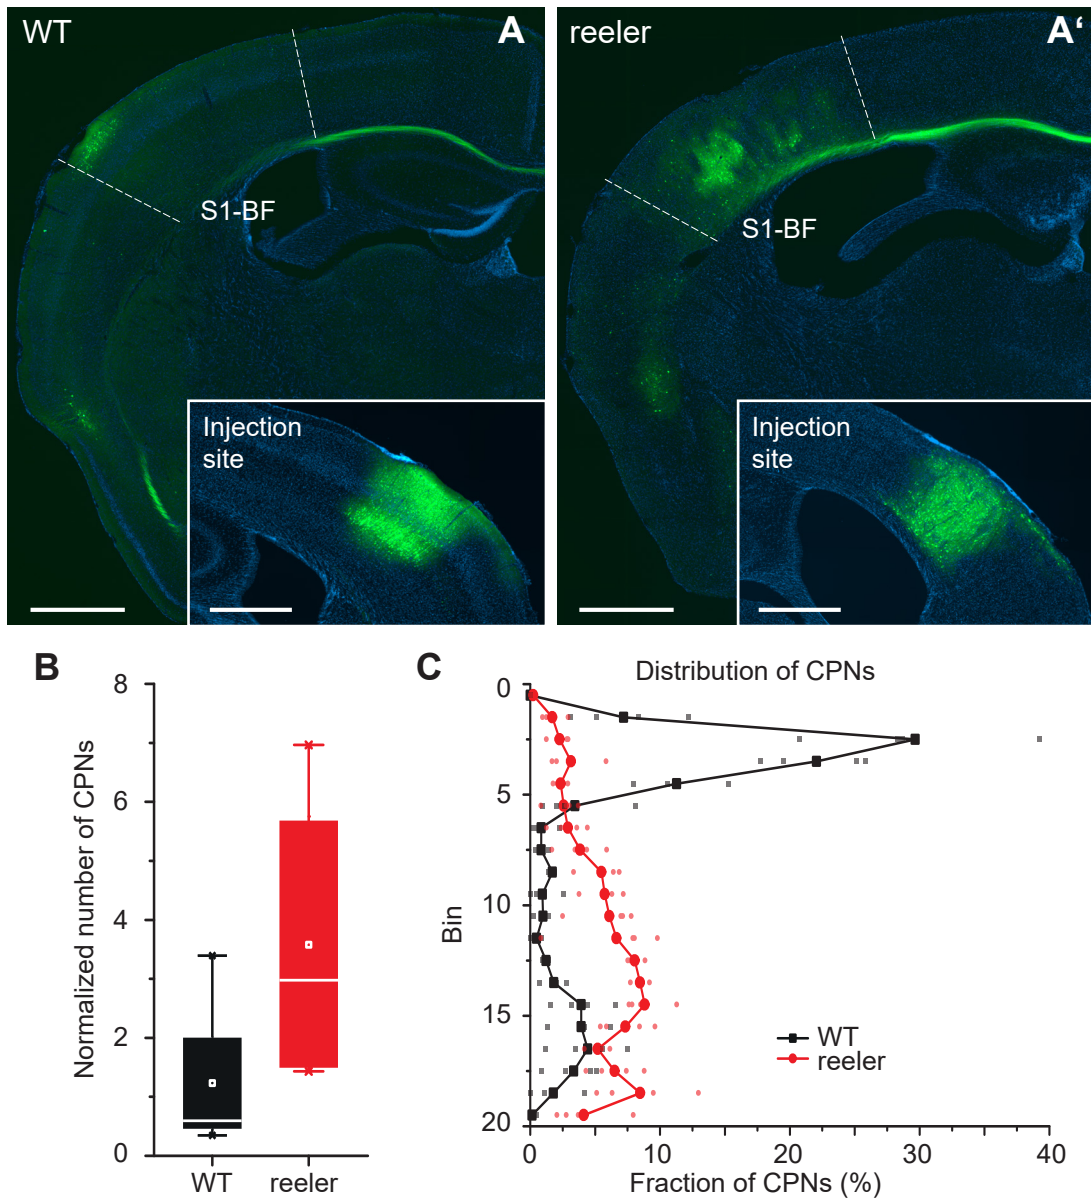

**Figure S4: Retrograde tracing of callosal projection neurons (CPNs). Related to Figure 4.**

(A, A') Coronal sections through the barrel cortex contralateral to the injection site of AAV-retro-EGFP. CPNs are more numerous and more dispersed in reeler. The injection site is shown in the insert (scale bar: overview: 1000  $\mu$ m; insert 500  $\mu$ m).

(B) Number of CPNs normalized by number of cells at the injection site in a volume from pia to white matter with a 200  $\mu$ m diameter around the injection site. In reeler mice, on average about 3 times more CPNs than in WT were labeled ( $n = 4$  per group).

(C) Distribution of CPNs across the cortical depth. The cortex was divided into 20 bins of equal size and the relative fraction of CPNs in each bin was plotted. CPNs in WT were predominantly in the upper part corresponding to LII/III. In reeler, they were shifted to the deeper parts of the cortex. The distribution of all CPNs was similar to the distribution of CPNs targeting VIP cells in both genotypes ( $n = 4$  per group; symbols connected by lines show average; small, transparent symbols show individual animals).
