# Supplementary material for: Increased Callosal Connectivity in Reeler Mice Revealed by Brain-Wide Input Mapping of VIP Neurons in Barrel Cortex
Source: PubMed Central journal article supplement — Cereb Cortex. 2020 Nov 2;31(3):1427–43. doi: 10.1093/cercor/bhaa280 (PMC7869096; doi:10.1093/cercor/bhaa280), 2020-11-02
Supplement: supplementary_tables_bhaa280.pdf [file supplementary_tables_bhaa280.pdf]

**Table S1.** Mean and standard deviation (SD) for fraction of starter cells labeled in each bin across the cortical thickness of barrel cortex. P-Values were calculated with pairwise comparisons and adjusted for multiple comparisons. Significant values are marked in red. Related to Figure 1.

| Bin | WT    |      | Reeler |      | p-value | adj.p-value |
|-----|-------|------|--------|------|---------|-------------|
|     | mean  | SD   | mean   | SD   |         |             |
| 1   | 0.50  | 0.21 | 0.37   | 0.23 | 0.3290  | 0.6580      |
| 2   | 9.04  | 3.05 | 2.08   | 0.59 | 0.0063  | 0.0550      |
| 3   | 17.18 | 1.04 | 4.80   | 0.57 | 0.0000  | 0.0000      |
| 4   | 12.88 | 1.67 | 7.62   | 2.06 | 0.0013  | 0.0146      |
| 5   | 10.42 | 1.53 | 7.54   | 1.15 | 0.0061  | 0.0550      |
| 6   | 9.84  | 0.86 | 6.47   | 0.55 | 0.0000  | 0.0004      |
| 7   | 8.24  | 1.19 | 6.87   | 0.71 | 0.0087  | 0.0606      |
| 8   | 6.18  | 1.06 | 6.44   | 1.13 | 0.7093  | 0.7093      |
| 9   | 4.82  | 0.99 | 6.45   | 1.10 | 0.0307  | 0.1363      |
| 10  | 3.79  | 0.85 | 6.07   | 1.37 | 0.0087  | 0.0606      |
| 11  | 2.88  | 0.54 | 6.69   | 1.00 | 0.0043  | 0.0433      |
| 12  | 2.36  | 0.57 | 6.51   | 1.56 | 0.0003  | 0.0039      |
| 13  | 1.77  | 0.46 | 6.00   | 1.34 | 0.0001  | 0.0013      |
| 14  | 2.23  | 0.90 | 5.53   | 0.69 | 0.0001  | 0.0011      |
| 15  | 1.78  | 0.33 | 5.76   | 0.32 | 0.0000  | 0.0000      |
| 16  | 1.29  | 0.49 | 4.42   | 1.14 | 0.0003  | 0.0039      |
| 17  | 1.20  | 0.43 | 3.85   | 0.95 | 0.0003  | 0.0039      |
| 18  | 1.41  | 0.39 | 2.97   | 0.31 | 0.0000  | 0.0007      |
| 19  | 1.55  | 0.42 | 2.41   | 0.62 | 0.0273  | 0.1363      |
| 20  | 0.66  | 0.34 | 1.17   | 0.75 | 0.1995  | 0.5986      |

**Table S2.** Mean and standard deviation (SD) for fraction of starter cells labeled in each bin across the cortical thickness of barrel cortex. P-Values were calculated with pairwise comparisons and adjusted for multiple comparisons. Significant values are marked in red. Related to Figure 2.

| Bin | WT    |      | Reeler |      | p-value | adj.p-value |
|-----|-------|------|--------|------|---------|-------------|
|     | mean  | SD   | mean   | SD   |         |             |
| 1   | 2.83  | 4.55 | 0.32   | 0.35 | 0.6012  | 1.0000      |
| 2   | 14.96 | 8.82 | 1.46   | 1.02 | 0.0066  | 0.0726      |
| 3   | 20.93 | 5.26 | 3.68   | 2.47 | 0.0006  | 0.0099      |
| 4   | 16.70 | 3.91 | 5.73   | 3.22 | 0.0001  | 0.0017      |
| 5   | 14.74 | 4.55 | 8.78   | 2.29 | 0.0093  | 0.0932      |
| 6   | 9.91  | 2.35 | 7.42   | 3.68 | 0.1578  | 0.4783      |
| 7   | 5.94  | 3.95 | 6.56   | 2.25 | 0.7254  | 1.0000      |
| 8   | 4.69  | 2.23 | 7.20   | 2.07 | 0.0503  | 0.3518      |
| 9   | 1.87  | 0.88 | 6.58   | 1.08 | 0.0000  | 0.0000      |
| 10  | 1.84  | 1.41 | 8.47   | 4.17 | 0.0048  | 0.0573      |
| 11  | 0.95  | 0.90 | 8.55   | 3.28 | 0.0006  | 0.0100      |
| 12  | 1.16  | 1.16 | 8.29   | 2.75 | 0.0000  | 0.0007      |
| 13  | 0.41  | 0.61 | 7.39   | 3.12 | 0.0019  | 0.0270      |
| 14  | 0.53  | 0.51 | 6.17   | 2.99 | 0.0021  | 0.0270      |
| 15  | 0.34  | 0.58 | 4.74   | 1.71 | 0.0017  | 0.0257      |
| 16  | 0.25  | 0.65 | 2.64   | 2.08 | 0.0236  | 0.1886      |
| 17  | 0.43  | 1.15 | 2.85   | 2.40 | 0.0115  | 0.1036      |
| 18  | 1.08  | 2.07 | 1.87   | 0.91 | 0.0894  | 0.4525      |
| 19  | 0.43  | 1.15 | 1.12   | 0.87 | 0.1196  | 0.4783      |
| 20  | 0.00  | 0.00 | 0.16   | 0.24 | 0.0754  | 0.4525      |

**Table S3.** Mean and standard deviation (SD) for input magnitude from global areas. P-Values were calculated with pairwise comparisons and adjusted for multiple comparisons. Significant values are marked in red. Related to Figure 4.

| Area                          | WT    |      | Reeler |      | p-value | adj.p-value |
|-------------------------------|-------|------|--------|------|---------|-------------|
|                               | mean  | SD   | mean   | SD   |         |             |
| All inputs                    | 34.26 | 9.49 | 21.74  | 7.58 | 0.0183  | 0.0183      |
| Ipsilateral cortical inputs   | 25.59 | 7.74 | 10.56  | 4.49 | 0.0008  | 0.0032      |
| Contralateral cortical inputs | 1.68  | 1.03 | 4.86   | 2.26 | 0.0175  | 0.0355      |
| All cortical inputs           | 27.27 | 8.64 | 15.42  | 6.11 | 0.0118  | 0.0355      |
| Thalamic inputs               | 6.36  | 2.13 | 5.93   | 2.10 | 0.7124  | 1.0000      |
| All subcortical inputs        | 6.99  | 2.24 | 6.32   | 2.18 | 0.5819  | 0.5819      |

**Table S4.** Mean and standard deviation (SD) for input fraction from individual areas. P-Values were calculated with pairwise comparisons and adjusted for multiple comparisons. Significant values are marked in red. Related to Figure 5.

| Area                                        | WT    |      | Reeler |      | p-value | adj.p-value |
|---------------------------------------------|-------|------|--------|------|---------|-------------|
|                                             | mean  | SD   | mean   | SD   |         |             |
| Orbital area                                | 0.36  | 0.13 | 0.13   | 0.09 | 0.0023  | 0.0854      |
| Primary motor c.                            | 2.33  | 0.76 | 1.24   | 0.69 | 0.0158  | 0.5534      |
| Secondary motor c.                          | 5.55  | 2.72 | 1.06   | 1.46 | 0.0041  | 0.1469      |
| Motor c.                                    | 7.88  | 3.28 | 2.29   | 2.07 | 0.0070  | 0.0350      |
| Anterior cingulate c.                       | 0.68  | 0.51 | 0.18   | 0.13 | 0.0407  | 1.0000      |
| Retrosplenial area                          | 1.26  | 1.04 | 0.25   | 0.15 | 0.0410  | 1.0000      |
| Primary somatosensory c. limb               | 0.96  | 0.49 | 1.42   | 0.69 | 0.1736  | 1.0000      |
| Primary somatosensory c. trunk              | 3.92  | 3.10 | 4.90   | 1.49 | 0.4637  | 1.0000      |
| Primary somatosensory c. body               | 4.87  | 3.24 | 6.32   | 1.33 | 0.3056  | 0.6113      |
| Secondary somatosensory c.                  | 26.27 | 6.99 | 19.47  | 3.98 | 0.0450  | 1.0000      |
| Dorsal auditory c.                          | 1.99  | 1.06 | 1.66   | 1.28 | 0.4557  | 1.0000      |
| Primary auditory c.                         | 5.43  | 1.64 | 0.96   | 0.85 | 0.0012  | 0.0443      |
| Ventral auditory c.                         | 2.21  | 1.13 | 1.40   | 1.15 | 0.2055  | 1.0000      |
| Auditory c.                                 | 9.63  | 3.40 | 4.02   | 3.01 | 0.0070  | 0.0350      |
| Posterior parietal associaton c.            | 13.02 | 7.95 | 7.87   | 3.49 | 0.1423  | 1.0000      |
| Anteromedial visual c.                      | 1.52  | 1.68 | 0.40   | 0.73 | 0.0724  | 1.0000      |
| Primary visual c.                           | 4.36  | 1.84 | 4.77   | 2.33 | 0.7251  | 1.0000      |
| Anterolateral visual c.                     | 3.00  | 1.89 | 1.83   | 1.34 | 0.2046  | 1.0000      |
| Visual c.                                   | 8.88  | 4.19 | 6.99   | 3.85 | 0.3962  | 0.6113      |
| Contralateral motor cortex                  | 0.14  | 0.08 | 0.16   | 0.07 | 0.6612  | 1.0000      |
| Contralateral barrel cortex                 | 3.55  | 1.04 | 20.22  | 6.20 | 0.0003  | 0.0134      |
| Contralateral secondary somatosensory c.    | 0.12  | 0.09 | 0.67   | 0.25 | 0.0008  | 0.0298      |
| Contralateral primary somatosensory body c. | 0.27  | 0.24 | 0.38   | 0.32 | 0.7104  | 1.0000      |
| Anteroventral nucleus                       | 0.26  | 0.27 | 0.45   | 0.57 | 0.4496  | 1.0000      |
| Anteromedial nucleus                        | 0.45  | 0.39 | 0.72   | 0.27 | 0.1704  | 1.0000      |
| Ventral anterior-lateral complex            | 1.09  | 0.50 | 2.11   | 1.01 | 0.0341  | 1.0000      |
| Ventral posteromedial complex               | 11.87 | 5.51 | 18.57  | 5.99 | 0.0262  | 0.8916      |
| Ventral posterolateral complex              | 0.16  | 0.13 | 0.76   | 0.23 | 0.0006  | 0.0233      |
| Posterior complex                           | 3.33  | 1.45 | 3.08   | 1.59 | 0.4557  | 1.0000      |
| Lateral dorsal nucleus                      | 0.13  | 0.18 | 0.36   | 0.25 | 0.1098  | 1.0000      |
| Lateral posterior nucleus                   | 0.24  | 0.20 | 0.23   | 0.12 | 0.9147  | 1.0000      |
| Rhomboid nulceus                            | 0.11  | 0.07 | 0.16   | 0.13 | 0.4547  | 1.0000      |
| Intralaminar nucleus                        | 1.33  | 0.39 | 1.74   | 0.33 | 0.0572  | 1.0000      |
| Lateral hypothalamic area                   | 0.22  | 0.12 | 0.18   | 0.12 | 0.4721  | 1.0000      |
| Zona Incerta                                | 0.22  | 0.11 | 0.17   | 0.12 | 0.8048  | 1.0000      |
| Substantia innominata                       | 0.13  | 0.06 | 0.13   | 0.10 | 0.9016  | 1.0000      |
| Diagonal band                               | 0.12  | 0.05 | 0.07   | 0.04 | 0.0823  | 1.0000      |
| Bed nuclei of the stria terminalis          | 0.04  | 0.05 | 0.04   | 0.05 | 1.0000  | 1.0000      |
| Globus pallidus                             | 0.63  | 0.28 | 0.66   | 0.26 | 0.8299  | 1.0000      |
| Clastrum                                    | 0.05  | 0.02 | 0.03   | 0.03 | 0.2314  | 1.0000      |
| Amygdala                                    | 0.04  | 0.05 | 0.02   | 0.03 | 0.4951  | 1.0000      |
| Periaqueductal gray                         | 0.05  | 0.03 | 0.07   | 0.05 | 0.4469  | 1.0000      |
| Ventral tegmental area                      | 0.07  | 0.03 | 0.10   | 0.06 | 0.2039  | 1.0000      |
| Midbrain reticular nucleus                  | 0.10  | 0.13 | 0.16   | 0.10 | 0.1282  | 1.0000      |
| Raphe Nuclei                                | 0.04  | 0.05 | 0.02   | 0.03 | 0.3663  | 1.0000      |

**Table S5.** Mean and standard deviation (SD) for fraction of cells transfected with AAV-retro-EGFP at either the injection site (right barrel cortex) or the contralateral hemisphere (left barrel cortex) labeled in each bin across the cortical thickness. Related to Figure S4.

| Bin | Injection site |      |        |      | Contralateral side |      |        |      |
|-----|----------------|------|--------|------|--------------------|------|--------|------|
|     | WT             |      | Reeler |      | WT                 |      | Reeler |      |
|     | mean           | SD   | mean   | SD   | mean               | SD   | mean   | SD   |
| 1   | 0.30           | 0.16 | 1.30   | 0.79 | 0.00               | 0.00 | 0.23   | 0.18 |
| 2   | 12.38          | 5.19 | 5.83   | 6.34 | 7.20               | 3.99 | 1.70   | 0.87 |
| 3   | 17.13          | 6.07 | 6.30   | 5.11 | 29.65              | 8.23 | 2.26   | 0.78 |
| 4   | 12.94          | 3.49 | 5.06   | 2.09 | 22.06              | 4.01 | 3.15   | 1.89 |
| 5   | 9.70           | 1.18 | 5.03   | 0.87 | 11.27              | 3.01 | 2.34   | 0.51 |
| 6   | 8.46           | 0.95 | 4.89   | 1.29 | 3.44               | 3.20 | 2.58   | 1.23 |
| 7   | 6.92           | 0.50 | 5.13   | 1.47 | 0.84               | 0.96 | 2.91   | 1.38 |
| 8   | 5.59           | 0.36 | 5.66   | 1.66 | 0.84               | 0.41 | 3.85   | 1.77 |
| 9   | 3.59           | 1.90 | 5.88   | 1.68 | 1.70               | 0.22 | 5.50   | 1.57 |
| 10  | 3.03           | 2.85 | 5.74   | 2.52 | 0.94               | 1.14 | 5.74   | 1.45 |
| 11  | 3.41           | 3.15 | 6.20   | 1.83 | 0.98               | 0.55 | 6.11   | 2.42 |
| 12  | 3.54           | 2.97 | 6.26   | 1.90 | 0.49               | 0.45 | 6.65   | 3.97 |
| 13  | 2.84           | 2.32 | 5.98   | 1.21 | 1.21               | 0.20 | 8.06   | 0.59 |
| 14  | 2.68           | 1.56 | 5.95   | 0.81 | 1.82               | 0.87 | 8.46   | 0.61 |
| 15  | 2.87           | 0.52 | 5.26   | 1.01 | 3.93               | 2.11 | 8.82   | 1.69 |
| 16  | 2.34           | 1.08 | 5.00   | 1.00 | 3.93               | 1.99 | 7.33   | 2.02 |
| 17  | 1.49           | 1.01 | 4.56   | 1.26 | 4.43               | 2.70 | 5.21   | 0.84 |
| 18  | 0.67           | 0.41 | 4.53   | 1.03 | 3.34               | 1.96 | 6.50   | 1.99 |
| 19  | 0.11           | 0.13 | 4.31   | 1.09 | 1.78               | 1.78 | 8.48   | 3.52 |
| 20  | 0.02           | 0.03 | 1.14   | 0.77 | 0.14               | 0.22 | 4.12   | 2.64 |

**Table S6.** Mean and standard deviation (SD) for fraction of projection neurons labeled in each bin across the cortical thickness. P-Values were calculated with pairwise comparisons and adjusted for multiple comparisons. Significant values are marked in red. Related to Figure 7.

| Bin  | Motor cortex |      |        |      |         |             | S1body cortex |      |        |      |         |             | Secondary somatosensory cortex |      |        |      |         |             |
|------|--------------|------|--------|------|---------|-------------|---------------|------|--------|------|---------|-------------|--------------------------------|------|--------|------|---------|-------------|
|      | WT           |      | Reeler |      | p-value | adj.p-value | WT            |      | Reeler |      | p-value | adj.p-value | WT                             |      | Reeler |      | p-value | adj.p-value |
| mean | SD           | mean | SD     | mean |         |             | SD            | mean | SD     | mean |         |             | SD                             | mean | SD     | mean |         |             |
| 1    | 0.00         | 0.00 | 0.55   | 1.13 | 0.1730  | 1.0000      | 0.00          | 0.00 | 2.30   | 1.08 | 0.0011  | 0.0180      | 0.00                           | 0.00 | 0.88   | 0.59 | 0.0011  | 0.0127      |
| 2    | 0.07         | 0.13 | 4.97   | 3.92 | 0.0407  | 0.6510      | 1.85          | 2.07 | 8.91   | 4.02 | 0.0023  | 0.0350      | 0.10                           | 0.11 | 5.14   | 1.29 | 0.0021  | 0.0207      |
| 3    | 1.88         | 1.11 | 16.86  | 9.07 | 0.0046  | 0.0866      | 2.98          | 2.16 | 11.17  | 2.58 | 0.0000  | 0.0006      | 0.96                           | 0.52 | 7.12   | 1.71 | 0.0000  | 0.0006      |
| 4    | 10.79        | 3.66 | 13.85  | 3.84 | 0.1522  | 1.0000      | 5.17          | 2.50 | 10.82  | 2.15 | 0.0007  | 0.0125      | 2.28                           | 0.90 | 9.67   | 3.21 | 0.0006  | 0.0083      |
| 5    | 16.04        | 1.86 | 11.55  | 6.82 | 0.1376  | 1.0000      | 7.72          | 6.84 | 11.30  | 3.42 | 0.2391  | 1.0000      | 4.72                           | 1.57 | 13.06  | 4.41 | 0.0018  | 0.0199      |
| 6    | 13.78        | 3.07 | 9.49   | 5.03 | 0.0779  | 1.0000      | 11.18         | 6.09 | 7.77   | 3.42 | 0.2205  | 1.0000      | 10.68                          | 3.55 | 10.73  | 1.70 | 0.9756  | 1.0000      |
| 7    | 14.70        | 3.08 | 9.47   | 4.18 | 0.0207  | 0.3729      | 8.98          | 6.44 | 9.29   | 2.40 | 0.9077  | 1.0000      | 17.38                          | 2.19 | 7.92   | 1.64 | 0.0000  | 0.0000      |
| 8    | 13.74        | 2.69 | 4.88   | 3.16 | 0.0001  | 0.0021      | 10.10         | 5.51 | 7.25   | 2.77 | 0.2456  | 1.0000      | 13.15                          | 2.52 | 5.84   | 1.72 | 0.0000  | 0.0006      |
| 9    | 9.39         | 2.67 | 5.78   | 3.40 | 0.0470  | 0.7050      | 7.96          | 2.84 | 6.01   | 0.57 | 0.1207  | 0.8447      | 6.89                           | 1.49 | 5.29   | 1.37 | 0.0587  | 0.3241      |
| 10   | 7.13         | 2.70 | 5.61   | 5.37 | 0.2086  | 1.0000      | 8.93          | 5.31 | 3.79   | 1.65 | 0.0439  | 0.4831      | 5.27                           | 0.78 | 4.06   | 1.30 | 0.0540  | 0.3241      |
| 11   | 5.32         | 2.12 | 2.03   | 1.97 | 0.0209  | 0.3729      | 9.75          | 9.96 | 3.61   | 1.17 | 0.0728  | 0.6556      | 3.83                           | 1.00 | 3.33   | 1.82 | 0.5375  | 1.0000      |
| 12   | 3.35         | 1.07 | 5.28   | 5.14 | 0.7104  | 1.0000      | 5.55          | 2.81 | 2.59   | 0.84 | 0.0314  | 0.4396      | 4.30                           | 1.40 | 3.45   | 1.11 | 0.2284  | 0.6851      |
| 13   | 1.86         | 1.58 | 1.85   | 1.46 | 0.9972  | 1.0000      | 4.38          | 2.83 | 2.19   | 1.31 | 0.0871  | 0.6966      | 6.62                           | 0.65 | 2.97   | 0.80 | 0.0000  | 0.0000      |
| 14   | 1.18         | 0.95 | 1.16   | 1.47 | 0.7938  | 1.0000      | 5.93          | 1.48 | 2.71   | 1.14 | 0.0006  | 0.0123      | 7.86                           | 1.01 | 2.90   | 1.24 | 0.0000  | 0.0001      |
| 15   | 0.52         | 0.89 | 1.30   | 1.51 | 0.6012  | 1.0000      | 4.10          | 1.95 | 2.46   | 0.88 | 0.0639  | 0.6391      | 6.59                           | 2.29 | 3.38   | 0.82 | 0.0091  | 0.0816      |
| 16   | 0.14         | 0.20 | 1.29   | 1.36 | 0.2194  | 1.0000      | 2.41          | 2.12 | 1.81   | 0.93 | 0.5061  | 1.0000      | 4.76                           | 1.40 | 3.29   | 0.77 | 0.0318  | 0.2227      |
| 17   | 0.00         | 0.00 | 1.52   | 2.56 | 0.0754  | 1.0000      | 0.73          | 0.84 | 2.22   | 1.42 | 0.0339  | 0.4396      | 2.53                           | 0.86 | 3.49   | 1.09 | 0.0917  | 0.3668      |
| 18   | 0.02         | 0.06 | 1.24   | 1.45 | 0.0739  | 1.0000      | 0.24          | 0.31 | 1.95   | 0.99 | 0.0019  | 0.0309      | 1.05                           | 0.35 | 3.04   | 0.61 | 0.0000  | 0.0001      |
| 19   | 0.05         | 0.09 | 0.81   | 1.24 | 0.3716  | 1.0000      | 0.47          | 0.57 | 1.41   | 0.71 | 0.0330  | 0.4396      | 0.54                           | 0.20 | 2.87   | 0.76 | 0.0006  | 0.0082      |
| 20   | 0.05         | 0.09 | 0.51   | 1.35 | 0.7221  | 1.0000      | 1.55          | 2.16 | 0.46   | 0.67 | 0.1506  | 0.9035      | 0.49                           | 0.29 | 1.58   | 0.93 | 0.0208  | 0.1665      |

| Bin | Primary auditory cortex |      |        |       |         |             | Primary visual cortex |       |        |      |         |             | Contralateral S1-BF |      |        |      |         |             |
|-----|-------------------------|------|--------|-------|---------|-------------|-----------------------|-------|--------|------|---------|-------------|---------------------|------|--------|------|---------|-------------|
|     | WT                      |      | Reeler |       | p-value | adj.p-value | WT                    |       | Reeler |      | p-value | adj.p-value | WT                  |      | Reeler |      | p-value | adj.p-value |
|     | mean                    | SD   | mean   | SD    |         |             | mean                  | SD    | mean   | SD   |         |             | mean                | SD   | mean   | SD   |         |             |
| 1   | 0.00                    | 0.00 | 0.00   | 0.00  | 1.0000  | 1.0000      | 0.00                  | 0.00  | 0.10   | 0.19 | 0.1730  | 1.0000      | 0.00                | 0.00 | 0.03   | 0.06 | 0.1730  | 0.8093      |
| 2   | 0.00                    | 0.00 | 4.70   | 4.54  | 0.0114  | 0.1704      | 0.22                  | 0.47  | 0.38   | 0.67 | 0.5514  | 1.0000      | 0.67                | 0.82 | 0.44   | 0.22 | 0.7002  | 1.0000      |
| 3   | 0.41                    | 0.47 | 14.00  | 10.61 | 0.0146  | 0.1903      | 0.49                  | 1.09  | 0.61   | 0.67 | 0.4951  | 1.0000      | 3.37                | 2.90 | 0.80   | 0.23 | 0.0012  | 0.0127      |
| 4   | 1.11                    | 0.71 | 10.65  | 6.35  | 0.0072  | 0.1219      | 2.06                  | 2.74  | 3.13   | 2.27 | 0.3062  | 1.0000      | 19.64               | 4.50 | 1.38   | 0.58 | 0.0000  | 0.0005      |
| 5   | 4.10                    | 1.61 | 19.19  | 10.18 | 0.0075  | 0.1219      | 5.78                  | 7.02  | 5.47   | 2.22 | 0.9139  | 1.0000      | 24.71               | 6.66 | 2.56   | 0.71 | 0.0001  | 0.0016      |
| 6   | 8.39                    | 2.82 | 15.28  | 11.59 | 0.1717  | 1.0000      | 19.20                 | 11.94 | 9.65   | 4.60 | 0.0847  | 0.6777      | 20.24               | 4.85 | 3.78   | 0.95 | 0.0001  | 0.0012      |
| 7   | 18.87                   | 7.10 | 11.92  | 6.78  | 0.0857  | 0.8567      | 34.26                 | 11.80 | 12.80  | 5.49 | 0.0009  | 0.0157      | 6.51                | 4.73 | 5.32   | 1.26 | 0.5417  | 1.0000      |
| 8   | 19.25                   | 5.01 | 8.64   | 8.87  | 0.0175  | 0.2098      | 21.63                 | 9.88  | 11.32  | 3.98 | 0.0339  | 0.3393      | 1.25                | 0.97 | 7.13   | 1.48 | 0.0000  | 0.0000      |
| 9   | 17.47                   | 5.23 | 1.80   | 2.47  | 0.0019  | 0.0386      | 8.03                  | 7.35  | 12.19  | 2.06 | 0.0973  | 0.6812      | 1.60                | 1.79 | 7.92   | 0.71 | 0.0000  | 0.0005      |
| 10  | 13.71                   | 5.57 | 2.12   | 2.52  | 0.0021  | 0.0393      | 3.87                  | 3.17  | 10.96  | 2.64 | 0.0007  | 0.0120      | 4.53                | 4.42 | 7.20   | 0.49 | 0.1619  | 0.8093      |
| 11  | 6.40                    | 3.49 | 6.46   | 11.94 | 0.1248  | 1.0000      | 1.85                  | 1.93  | 6.40   | 1.78 | 0.0006  | 0.0118      | 6.18                | 2.82 | 7.80   | 1.25 | 0.1912  | 0.8093      |
| 12  | 2.94                    | 1.11 | 0.36   | 0.96  | 0.0052  | 0.0940      | 1.03                  | 1.15  | 6.35   | 1.56 | 0.0000  | 0.0002      | 4.77                | 3.22 | 7.82   | 1.32 | 0.0496  | 0.2974      |
| 13  | 1.44                    | 1.08 | 1.26   | 2.30  | 0.2395  | 1.0000      | 0.65                  | 0.97  | 5.38   | 4.07 | 0.0032  | 0.0442      | 2.34                | 1.71 | 6.87   | 1.48 | 0.0002  | 0.0025      |
| 14  | 1.72                    | 1.55 | 1.10   | 1.52  | 0.4249  | 1.0000      | 0.45                  | 0.50  | 3.42   | 2.65 | 0.0248  | 0.2981      | 1.97                | 1.26 | 7.33   | 1.29 | 0.0000  | 0.0001      |
| 15  | 1.10                    | 1.02 | 0.00   | 0.00  | 0.0114  | 0.1704      | 0.04                  | 0.09  | 3.85   | 0.94 | 0.0014  | 0.0226      | 1.80                | 1.81 | 6.85   | 1.52 | 0.0001  | 0.0016      |
| 16  | 1.08                    | 0.99 | 0.06   | 0.16  | 0.0236  | 0.2593      | 0.12                  | 0.22  | 3.51   | 1.71 | 0.0017  | 0.0257      | 0.37                | 0.68 | 7.36   | 1.22 | 0.0019  | 0.0135      |
| 17  | 0.79                    | 0.69 | 1.13   | 2.29  | 0.3598  | 1.0000      | 0.00                  | 0.00  | 1.36   | 1.32 | 0.0307  | 0.3379      | 0.00                | 0.00 | 6.85   | 0.95 | 0.0011  | 0.0127      |
| 18  | 0.53                    | 0.58 | 0.18   | 0.33  | 0.2291  | 1.0000      | 0.00                  | 0.00  | 1.46   | 1.26 | 0.0114  | 0.1476      | 0.05                | 0.13 | 5.59   | 0.88 | 0.0014  | 0.0127      |
| 19  | 0.63                    | 0.66 | 0.24   | 0.64  | 0.1196  | 1.0000      | 0.14                  | 0.38  | 1.50   | 2.52 | 0.0658  | 0.5925      | 0.00                | 0.00 | 4.96   | 0.71 | 0.0011  | 0.0127      |
| 20  | 0.06                    | 0.11 | 0.89   | 2.36  | 0.7221  | 1.0000      | 0.18                  | 0.23  | 0.18   | 0.25 | 0.8875  | 1.0000      | 0.49                | 0.29 | 1.58   | 0.93 | 0.0011  | 0.0127      |
